# Supplementary material for: Thermo- and redox-responsive dumbbell-shaped copolymers: from structure design to the LCST–UCST transition
Source: Royal Society of Chemistry journal article supplement (doi:10.1039/c9py01566c), 2019-12-02
Supplement: c9py01566c1.pdf [file c9py01566c1.pdf]

**Electronic Supplementary Information for:**

**Thermo- and redox-responsive dumbbell-shaped copolymers: from structure design to LCST-UCST transition**

Hui Zou<sup>\*a</sup>, Qiliang Wu<sup>a</sup>, Qianwei Li<sup>a</sup>, Chunyao Wang<sup>b</sup>, Li Zhou<sup>a</sup>, Xiao-Hua Hou<sup>a</sup> and Weizhong Yuan<sup>\*b</sup>

*<sup>a</sup>Department of Polymer Science and Engineering, School of Chemistry and Chemical Engineering, and Anhui Key Laboratory of Advanced Catalytic Materials and Reaction Engineering, Hefei University of Technology, Hefei 230009, Anhui Province, China*

*<sup>b</sup>School of Materials Science and Engineering, Tongji University, 201804, Shanghai, China*

Corresponding author: zouh@hfut.edu.cn (H. Zou); yuanwz@tongji.edu.cn (W. Yuan)

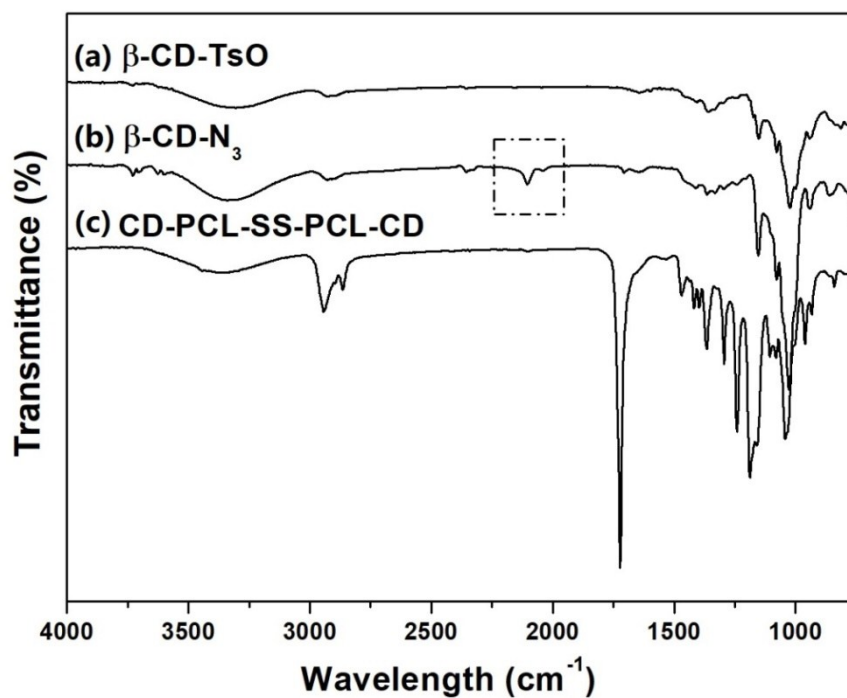

Fig. S1 FT-IR spectra of (a)  $\beta$ -CD-TsO, (b)  $\beta$ -CD-N<sub>3</sub> and (c) CD-PCL-SS-PCL-CD.

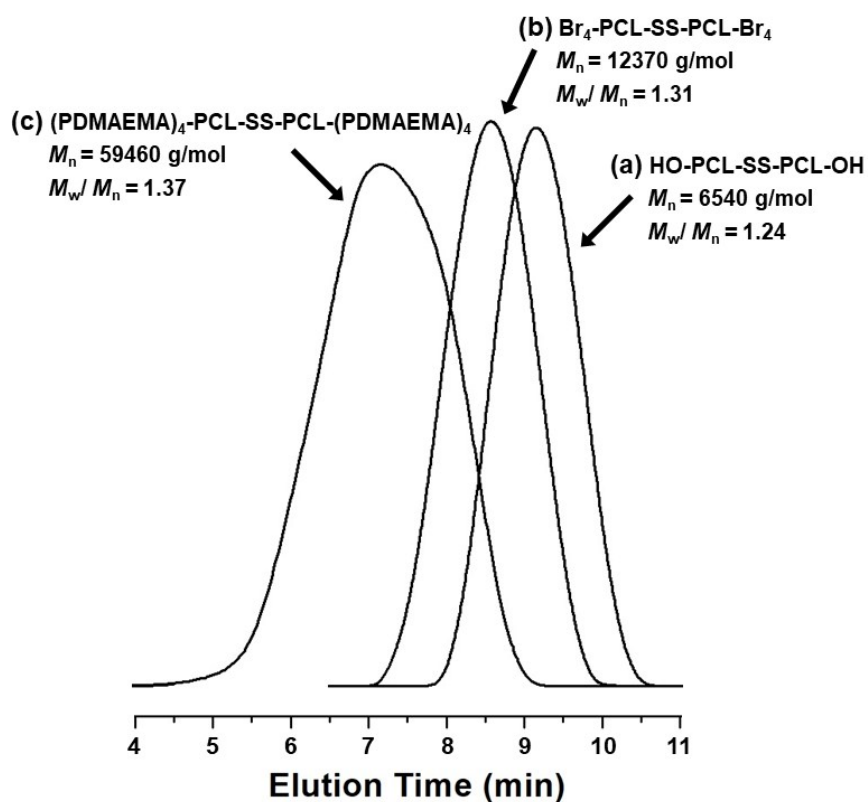

Fig. S2 GPC traces of (a) HO-PCL-SS-PCL-OH, (b) Br<sub>4</sub>-PCL-SS-PCL-Br<sub>4</sub>, and (c) (PDMAEMA)<sub>4</sub>-PCL-SS-PCL-(PDMAEMA)<sub>4</sub>.

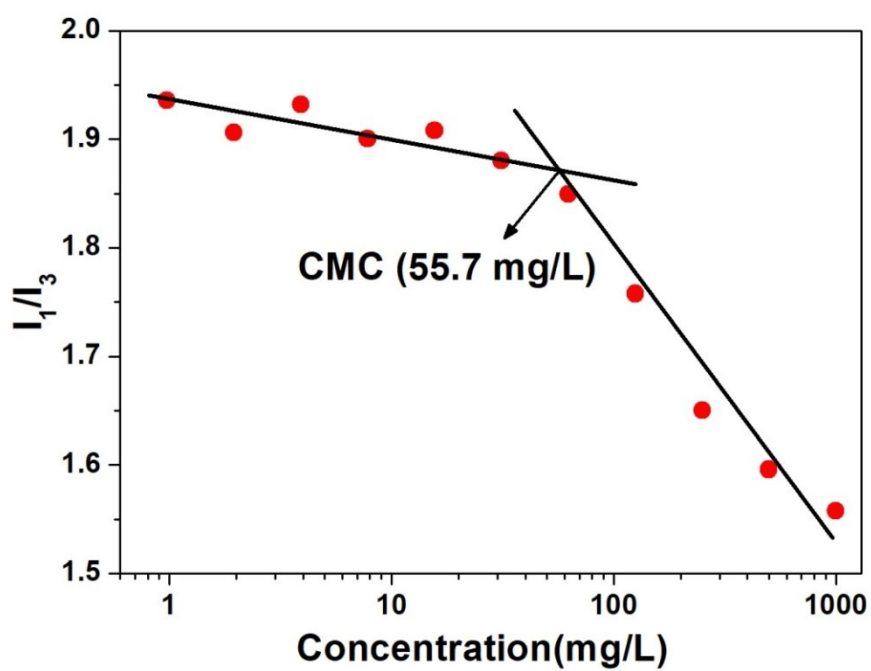

**Fig. S3** CMC of the dumb-shaped copolymer (PDMAEMA)<sub>4</sub>-PCL-SS-PCL-(PDMAEMA)<sub>4</sub>.

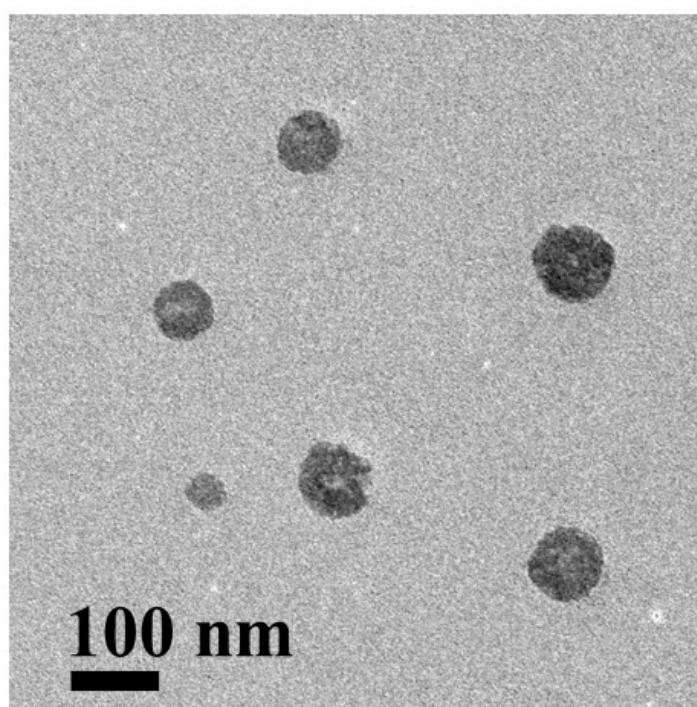

**Fig. S4** TEM images of (PDMAE)PS<sub>4</sub>-PCL-SS-PCL-(PDMAE)PS<sub>4</sub> aqueous solutions at 45 °C.
